# Supplementary material for: The antiferromagnetic phase of a wurtzite nickel sulfide monolayer
Source: Royal Society of Chemistry journal article supplement (doi:10.1039/d4cp01823k), 2024-01-01
Supplement: d4cp01823k1.pdf [file d4cp01823k1.pdf]

## Supplementary Information for: Antiferromagnetic Phase of Wurtzite Nickel Sulfide Monolayer

S. Davoudi Tanha, M. Modarresi,\* and M. R. Roknabadi  
*Department of Physics, Faculty of Science, Ferdowsi University of Mashhad, Mashhad, Iran*

T. Hu†  
*School of Materials Science and Engineering, State Key Laboratory of Advanced Special Steels, Shanghai University, Shanghai 200444, China*

A. Mogulkoc  
*Department of Physics, Faculty of Sciences, Ankara University, 06100 Tandogan, Ankara, Turkey*

### I. THE CONVERGENCE OF THE HUBBARD U PARAMETER

The Hubbard  $U$  parameter for the  $[\text{NiS}]_2$  monolayer is determined using the self-consistent linear response method [1]. In each iteration, the crystal structure is optimized using the Broyden-Fletcher-Goldfarb-Shanno algorithm, with a convergence threshold of  $10^{-6}$  Ry for the total energy and  $10^{-6}$  Ry/Bohr for atomic forces, using the Hubbard  $U$  parameter value obtained from the previous step. Iterating this process makes the value of the Hubbard  $U$  parameter converge to a constant value. Starting with a very small Hubbard  $U$  parameter, we find that the Hubbard  $U$  parameter converges to  $U = 7.58$  eV.

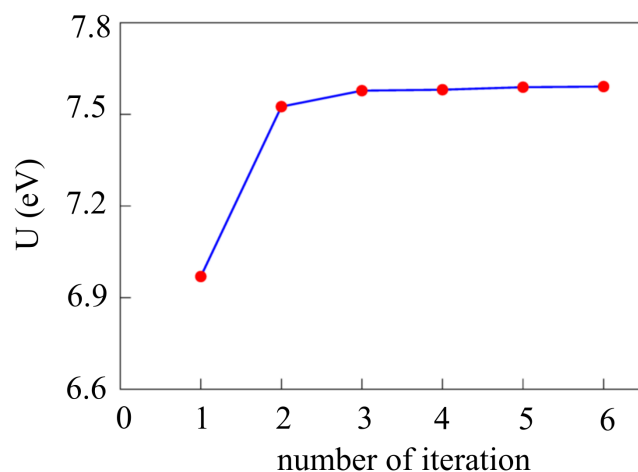

FIG. S1. The convergence of the Hubbard  $U$  parameter value calculated from the self-consistent DFT+ $U$  approach. (After the first iteration, the  $U$  is evaluated as  $U=6.9$  eV.)

### II. DERIVATION OF THE MAGNON DISPERSION RELATION FOR THE WURTZITE-ANTIFERROMAGNETS

#### A. Holstein-Primakoff transformation

Here, we perform a transformation of the anisotropic spin model to a bosonic Hamiltonian of spin-wave excitations. For this purpose, we use the first-order Holstein-Primakoff transformation (HP) of the spin operators. For the spin-up

\* m.modarresi@um.ac.ir

† taohu@shu.edu.cn

in the top sublattice,

$$\begin{aligned} S_{r,T}^+ &= \sqrt{2S}a_{r,T}, \\ S_{r,T}^- &= \sqrt{2S}a_{r,T}^\dagger, \\ S_{r,T}^z &= S - a_{r,T}^\dagger a_{r,T}, \end{aligned} \quad (1)$$

and for the spin-down in the bottom sublattice,

$$\begin{aligned} S_{r,B}^+ &= \sqrt{2S}a_{r,B}^\dagger, \\ S_{r,B}^- &= \sqrt{2S}a_{r,B}, \\ S_{r,B}^z &= a_{r,B}^\dagger a_{r,B} - S. \end{aligned} \quad (2)$$

The Heisenberg Hamiltonian can be rewritten as Eq. 1 in the manuscript,

$$\begin{aligned} H &= H_1 + H_2 + H_3, \\ H_1 &= J \sum_{\mathbf{r}, \delta, \alpha \in T, B} \mathbf{S}_{\mathbf{r}, \alpha} \cdot \mathbf{S}_{\mathbf{r} + \delta, \alpha}, \\ H_2 &= J_\alpha \sum_{\mathbf{r}, \delta} \mathbf{S}_{\mathbf{r}, T} \cdot \mathbf{S}_{\mathbf{r} + \delta, B}, \\ H_3 &= -A \sum_{\mathbf{r}, \alpha \in T, B} (S_{\mathbf{r}, \alpha}^z)^2. \end{aligned} \quad (3)$$

Before deriving each term of the Hamiltonian, we transform the real-space operators  $a$  and  $a^\dagger$  to the reciprocal space by the Fourier transform,

$$a_i = \frac{1}{\sqrt{N}} \sum_{\mathbf{k}} e^{i\mathbf{k} \cdot \mathbf{r}_i} a_{\mathbf{k}} \quad (4)$$

where  $N$  denotes the number of sites. The Fourier transformation yields,

$$\begin{aligned} S_{r,T}^+ &= \sqrt{\frac{2S}{N}} \sum_{\mathbf{k}} e^{i\mathbf{k} \cdot \mathbf{r}_i} a_{\mathbf{k}}, \\ S_{r,T}^- &= \sqrt{\frac{2S}{N}} \sum_{\mathbf{k}} e^{-i\mathbf{k} \cdot \mathbf{r}_i} a_{\mathbf{k}}^\dagger, \\ S_{r,T}^z &= S - \frac{1}{N} \sum_{\mathbf{k}, \mathbf{k}'} e^{i(\mathbf{k}' - \mathbf{k}) \cdot \mathbf{r}_i} a_{\mathbf{k}}^\dagger a_{\mathbf{k}}, \end{aligned} \quad (5)$$

for the spin-up, and

$$\begin{aligned} S_{r,B}^+ &= \sqrt{\frac{2S}{N}} \sum_{\mathbf{k}} e^{-i\mathbf{k} \cdot \mathbf{r}_i} a_{\mathbf{k}}^\dagger, \\ S_{r,B}^- &= \sqrt{\frac{2S}{N}} \sum_{\mathbf{k}} e^{i\mathbf{k} \cdot \mathbf{r}_i} a_{\mathbf{k}}, \\ S_{r,B}^z &= \frac{1}{N} \sum_{\mathbf{k}, \mathbf{k}'} e^{i(\mathbf{k}' - \mathbf{k}) \cdot \mathbf{r}_i} a_{\mathbf{k}}^\dagger a_{\mathbf{k}} - S, \end{aligned} \quad (6)$$

for the spin-down.

(1) Transformation of  $H_1$ :

The  $H_1$  can be rewritten as,

$$\begin{aligned}
H_1 &= J \sum_{r,\delta} \mathbf{S}_{r,T} \cdot \mathbf{S}_{r+\delta,T} + \mathbf{S}_{r,B} \cdot \mathbf{S}_{r+\delta,B} \\
&= S_{r,T}^z S_{r+\delta,T}^z + \frac{1}{2} (S_{r,T}^+ S_{r+\delta,T}^- + S_{r,T}^- S_{r+\delta,T}^+) \\
&\quad + S_{r,B}^z S_{r+\delta,B}^z + \frac{1}{2} (S_{r,B}^+ S_{r+\delta,B}^- + S_{r,B}^- S_{r+\delta,B}^+)
\end{aligned} \tag{7}$$

Using the HP transformation as Eq. 5 and Eq. 6, and keeping only second-order terms in magnon operators,  $H_1$  can be derived,

$$H_1 = 2JS \sum_k (6 - \gamma_k) (a_{k,T}^\dagger a_{k,T} + a_{k,B}^\dagger a_{k,B}). \tag{8}$$

To obtain this equation, one can use  $\sum_{\mathbf{r}_i} e^{-i\mathbf{k}-\mathbf{k}' \cdot \mathbf{r}_i} = N\delta_{\mathbf{k},\mathbf{k}'}$ . In the above equation, the structure factor is defined as,  $\gamma_{\mathbf{k}} = \cos\mathbf{k} \cdot \delta$  and the number of the nearest neighbors of each atom within its sublattice is six.

(2) Transformation of  $H_2$ :

$H_2$  can be rewritten,

$$\begin{aligned}
H_2 &= J_\alpha \sum_{\mathbf{r},\delta} \mathbf{S}_{\mathbf{r},T} \cdot \mathbf{S}_{\mathbf{r}+\delta,B} \\
&= J_\alpha \sum_{r,\delta} S_{r,T}^z S_{r+\delta,B}^z + \frac{1}{2} (S_{r,T}^+ S_{r+\delta,B}^- + S_{r,T}^- S_{r+\delta,B}^+)
\end{aligned} \tag{9}$$

By applying Eq. 5 and Eq. 6,

$$\begin{aligned}
H_2 &= 2J_\alpha S \sum_k 3(a_{k,T}^\dagger a_{k,T} + a_{k,B}^\dagger a_{k,B}) \\
&\quad + \gamma'_k (a_{k,T} a_{-k,B}).
\end{aligned} \tag{10}$$

In Eq 10,  $\gamma'_k$  represents the structure factor and the number of the nearest neighbors of each atom in the adjacent sublattices is three.

(3) Transformation of  $H_3$ :

At last,

$$\begin{aligned}
H_3 &= -A \sum_{\mathbf{r},\alpha \in T,B} (S_{\mathbf{r},\alpha}^z)^2 \\
&= -A \sum_r S_{z,T}^2 + S_{z,B}^2
\end{aligned} \tag{11}$$

The Fourier representation takes the form,

$$H_3 = 2AS \sum_k a_{k,T}^\dagger a_{k,T} + a_{k,B}^\dagger a_{k,B} \tag{12}$$

Finally, after combining Eqs. 8, 10, and 12, we obtain the Hamiltonian of noninteracting magnons,

$$\begin{aligned}
H &= H_k + H_{-k}, \\
H_k &= \sum_k \sum_\alpha \frac{A_k}{2} a_{k,\alpha}^\dagger a_{k,\alpha} + B_k a_{k,T} a_{-k,B} + H.c., \\
A_k &= S(2J(6 - \gamma_k) + 6J_\alpha + 2A), \\
B_k &= 2J_\alpha S \gamma'_k.
\end{aligned} \tag{13}$$

Since the Hamiltonian is still non-diagonal, an additional unitary transformation is required. To determine the magnon dispersion relation, we proceed with the derivation using the Bogoliubov transformation.

## B. Bogoliubov transformation

As mentioned in the manuscript, the Bogoliubov Hamiltonian can be written,

$$H_{Bogoliubov} = \frac{1}{2} \begin{pmatrix} a_{k,T}^\dagger & a_{k,B}^\dagger & a_{k,T} & a_{k,B} \end{pmatrix} \Lambda_k \begin{pmatrix} a_{k,T} \\ a_{k,B} \\ a_{k,T}^\dagger \\ a_{k,B}^\dagger \end{pmatrix} \quad (14)$$

As a result, Eq. 13 can be written as  $\Lambda_k e = \omega_k e$ , where,

$$\Lambda_k = \begin{pmatrix} A_k & 0 & 0 & -B_k \\ 0 & A_k & -B_k & 0 \\ 0 & B_k & -A_k & 0 \\ B_k & 0 & 0 & -A_k \end{pmatrix}, e = \begin{pmatrix} u_T \\ u_B \\ v_T \\ v_B \end{pmatrix}. \quad (15)$$

to diagonalize the Hamiltonian and follow the commutation law of bosons,

$$\begin{aligned} \sum_{\alpha} |u_{\alpha}^2| + |v_{\alpha}^2| \\ \sum_{\alpha} |u_{\alpha}^2| - |v_{\alpha}^2|, \end{aligned} \quad (16)$$

must be preserved, respectively.

to derive  $\omega_k$ , one can write Eq. 15 as,

$$\begin{aligned} A_k u_T - B_k v_B &= \omega_k u_T \\ A_k u_B - B_k v_T &= \omega_k u_B \\ B_k u_B - A_k v_T &= \omega_k v_T \\ B_k u_T - A_k v_B &= \omega_k v_B \end{aligned} \quad (17)$$

By squaring the above equation,

$$\begin{aligned} A_k^2 u_T^2 + B_k^2 v_B^2 - 2A_k B_k u_T v_B &= \omega_k^2 u_T^2 \\ A_k^2 u_B^2 + B_k^2 v_T^2 - 2A_k B_k u_B v_T &= \omega_k^2 u_B^2 \\ B_k^2 u_B^2 + A_k^2 v_T^2 - 2A_k B_k u_B v_T &= \omega_k^2 v_T^2 \\ B_k^2 u_T^2 + A_k^2 v_B^2 - 2A_k B_k u_T v_B &= \omega_k^2 v_B^2 \end{aligned} \quad (18)$$

After substituting, for example, the first and the third equations of Eq. 18,

$$A_k^2 (u_T^2 - v_T^2) - B_k^2 (u_B^2 - v_B^2) = \omega_k^2 (u_T^2 - v_T^2) \quad (19)$$

As a result of Eq. 16, the magnon dispersion equation can be written as,

$$\omega_k = \sqrt{A_k^2 - B_k^2}. \quad (20)$$

## III. THE ELECTRONIC BAND STRUCTURE

The electronic band structure of the 2D [NiS]<sub>2</sub> monolayer is plotted in ferromagnetic and antiferromagnetic phases. The Fermi level crosses with bands in both phases, indicating the metallic behavior of the monolayer.

---

[1] I. Timrov, N. Marzari and M. Cococcioni, *Computer Physics Communications*, 2022, **279**, 108455.

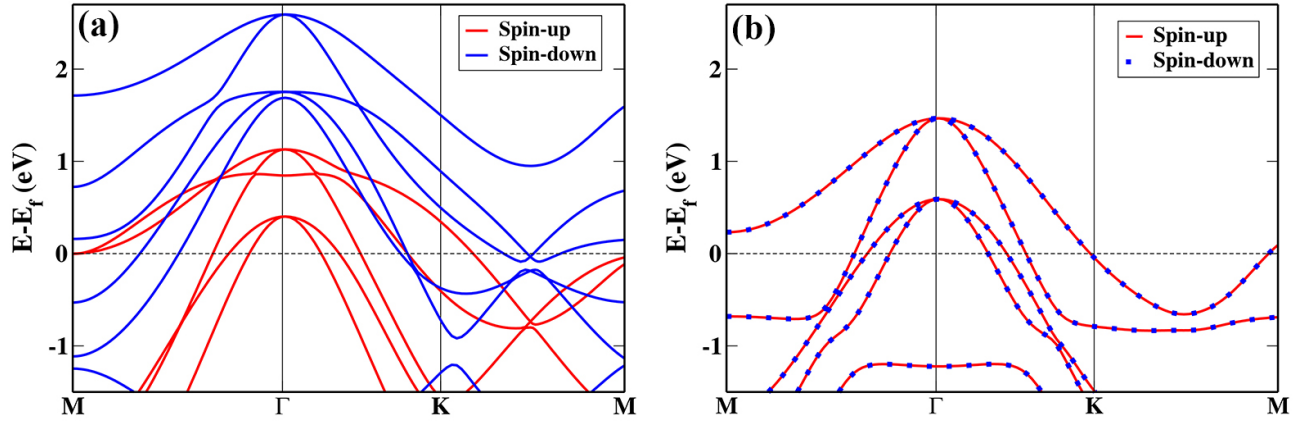

FIG. S2. The electronic band structure of  $[\text{NiS}]_2$  monolayer in (a) FM and (b) AFM spin configuration. The blue and red line is shown as up and down spin, respectively. horizontal black line in (a), and (b) indicates the Fermi level energy which is set to 0 eV
